# Supplementary material for: Surface Modification of Electrospun Scaffolds for Endothelialization of Tissue-Engineered Vascular Grafts Using Human Cord Blood-Derived Endothelial Cells
Source: MDPI journal article supplement (doi:10.3390/jcm8020185), 2019-02-04
Supplement: s1 [file s1]

**Table S1.** Detailed information on antibodies.

| <b>Antibody</b>                               | <b>Company</b> | <b>Catalog Number</b> | <b>Concentration</b> | <b>Application</b>                 |
|-----------------------------------------------|----------------|-----------------------|----------------------|------------------------------------|
| CD31                                          | BD Biosciences | 555445                | 20 $\mu$ L/test      | Flow cytometry,<br>immunochemistry |
| CD45                                          | BD Biosciences | 562394                | 5 $\mu$ L/test       | Flow cytometry                     |
| CD105                                         | BD Biosciences | 562408                | 5 $\mu$ L/test       | Flow cytometry                     |
| Intercellular adhesion<br>molecule 1 (ICAM-1) | Abcam          | ab2213                | 1/100                | ELISA                              |
| Vascular cell adhesion<br>molecule 1 (VCAM-1) | Abcam          | ab98954               | 1/100                | ELISA                              |
| Endothelial nitric oxide<br>synthase (eNOS)   | Abcam          | ab76198               | 1/1000               | ELISA                              |
| Rabbit anti-mouse<br>secondary antibody       | Abcam          | ab6728                | 1/1000               | ELISA                              |

ELISA: Enzyme-linked immunosorbent assay.

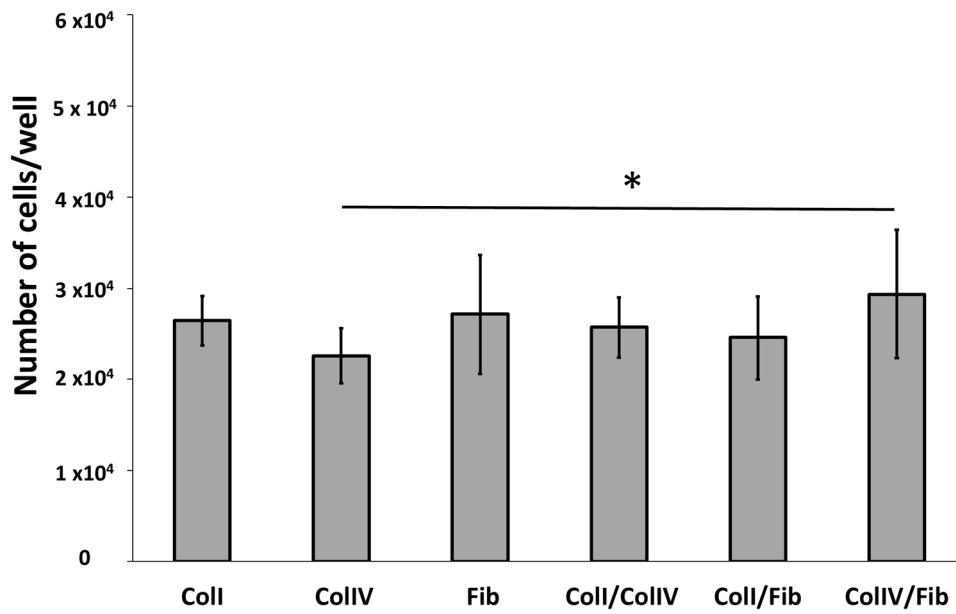

**Figure S1.** Cell number of hCB-ECs 3 days post seeding on coverslips coated with collagen type I (Coll), collagen type IV (ColIV), fibronectin (Fib), or a 1:1 mixture of Coll and ColIV (Coll/ColIV), Coll and Fib (Coll/Fib), or ColIV and Fib (ColIV/Fib) in 96-well plates. Error bars shown are standard deviations (\*  $p < 0.05$ ;  $n = 6$ ). The combination of collagen IV and fibronectin promotes hCB-EC growth when compared to collagen IV alone.

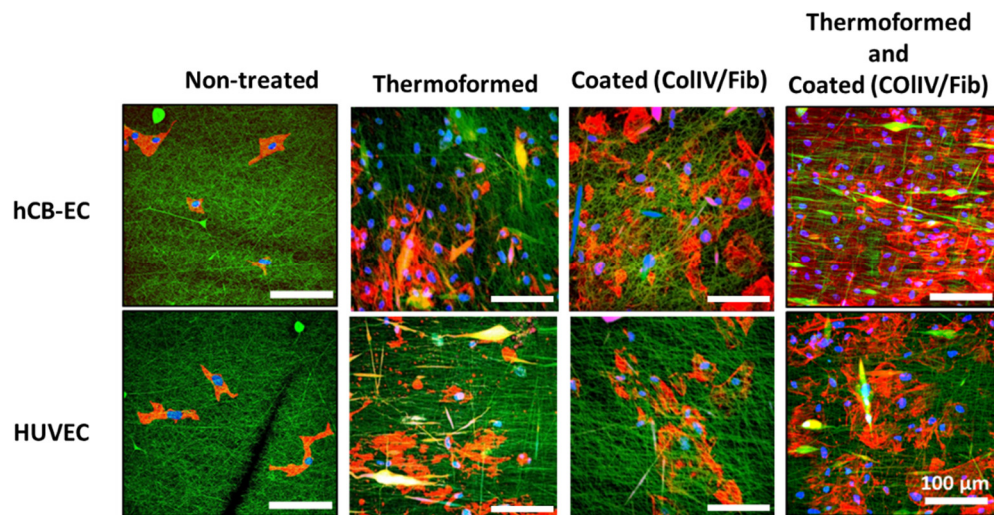

**Figure S2.** Maximum intensity projection multiphoton images of Human cord blood-derived endothelial cells (hCB-ECs) or human umbilical vein endothelial cells (HUVECs) cultured in non-treated, thermoformed, coated with collagen IV and fibronectin, or thermoformed and coated scaffolds after 7 days of culture (green—scaffolds; blue—nuclei; red—F-actin). Scale bar = 100  $\mu\text{m}$ . The thermoformed and coated scaffolds are the most favorable for cell attachment and cell spreading compared to thermoformed alone or coated alone in both cell types.

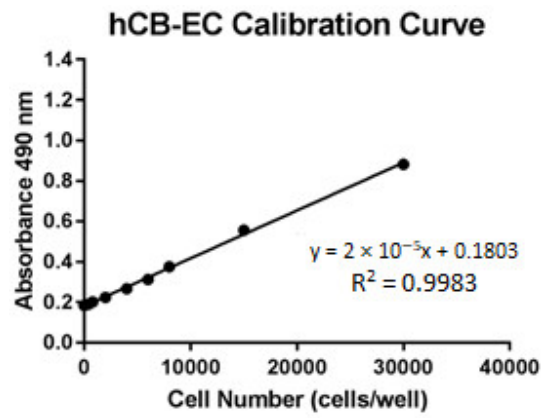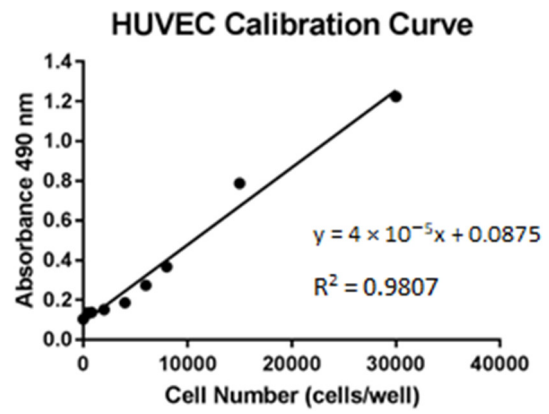

Figure S3. MTS assay calibration curves for hCB-EC and HUVEC ( $n = 6$ ).
